---

**ABSTRACTS OF THE  
41st Annual Meeting of the Society for Epidemiologic Research  
June 24–27, 2008**

---

**SESSIONS**

**S1 Poster Session 1 (001–134)**

**Spotlight Sessions 1**

- S34 Race/Class Inequalities (135–138)**
- S35 Smoking and Pregnancy: Trends, Methods, and Consequences (139–140)**
- S36 Social Epidemiology of Mental Disorders (144–147)**
- S37 Poverty, Ethnicity, Social Class and the Life Course in Aging (148–152)**
- S39 Pancreatic Cancer—New Findings (153–156)**
- S40 Health Services Epidemiology (157–161)**

**Symposia 1**

- S41 Unequal Racial/Ethnic Distribution of Breast Cancer Subtypes: Identifying Mechanisms by Which Adverse Social Environments May Modulate Genetic Vulnerabilities (162–165)**
- S42 Epidemiology Responds to Its Media Critics (166)**
- S42 Social Epidemiology and Behavioral Health: Methodologic Approaches, Problems, and Promise (167–171)**
- S43 Social and Environmental Determinants of Diabetes: What We Can Learn from National to Community Level Data (172–176)**
- S45 Making Lemonade from Lemons: Implications of Marginal Structural Model Analysis for Public Health Planning and Policy (177–180)**
- S46 Limitations of Neighborhoods Research for Understanding Racial Health Disparities (181–185)**

**Spotlight Sessions 2**

- S47 Causal Methods for Cardiovascular Epidemiology (186–189)**
  - S48 Understanding the Social Causes of Population Health (190–195)**
  - S49 Fetal Growth and Prematurity (196–199)**
  - S50 Genes and the Environment: New Findings, Current Issues (200–205)**
- S52 Poster Session 2 (206–340)**

## **Plenary Session**

### **Spotlight Sessions 3**

- S86 Measurement Error: Causation, Calibration, Correction (341–345)**
- S87 Macrosocial Forces and Population Health (346–350)**
- S88 Reproduction and Its Connections to Other Outcomes (351–353)**
- S89 Cardiovascular Epidemiology: What More Do We Want to Know? (354–356)**
- S90 Current Topics in Breast Cancer Research (357–361)**
- S91 Trends in the United States HIV/AIDS Epidemic (362–366)**

### **Symposia 2**

- S92 Strengthening the Reporting of Observational Studies in Epidemiology: Pros and Cons of the STROBE checklist (367)**
- S92 Methodological Issues in the Analysis of new Biomarkers (368–371)**
- S93 Intent-to-Treat Analyses of 2-Armed Randomized Controlled Trials: Can We Improve on the Gold Standard (372–375)**
- S94 Threats to Epidemiologic Science from Organized Interests (376)**
- S95 Integration of Biological Pathways in Epidemiologic Research of the Social Gradient in Health (377–381)**

### **Spotlight Sessions 4**

- S96 Novel Statistical Analysis (382–385)**
- S97 Understanding the Social Causes of Health and Disease (386–391)**
- S98 Psychiatric Epidemiology: A Focus on Common Mood-Anxiety Disorders (392–397)**
- S100 Obesity and Weight Gain in Women (398–402)**
  
- S101 Poster Session 3 (403–537)**

### **Symposia 3**

- S135 “Whose Data Are They?”—Opportunities and Pitfalls of Publicly Accessible Data (538)**
- S135 Climate Change and Human Health: Risks and Responses (539–542)**
- S136 Choosing Appropriate Counterfactuals for Research on the Health Effects of Socioeconomic Position and Neighborhoods (543–546)**
- S137 The “Hispanic Paradox”: What’s Real and What’s Not (547–550)**

## **Spotlight Sessions 5**

**S138 Hypermodern Methods (551–554)**

**S139 Social Epidemiology: Contextual and Lifecourse Approaches (555–559)**

**S140 Epidemiology of Cancers of the Reproductive Tract (560–563)**

**S141 Environmental Epidemiology (564–569)**

**S143 Latebreaker Session (L1–L16)**
